# Supplementary material for: Dereplication of Cytochalasans and Octaketides in Cytotoxic Extracts of Endophytic Fungi from Casearia arborea (Salicaceae)
Source: MDPI journal article supplement (doi:10.3390/metabo12100903), 2022-09-26
Supplement: s1 [file s1]

# SUPPLEMENTARY INFORMATION MATERIAL

## Dereplication of Cytochalasans and Octaketides in Cytotoxic Extracts of Endophytic Fungi from *Casearia arborea* (Salicaceae)

Augusto L. Santos <sup>1</sup>, Marisa Ionta <sup>2</sup>, Renato O. Horvath <sup>2</sup>, Marisi G. Soares <sup>3</sup>, Daniele O. Silva <sup>3</sup>, Eunizinis S. Kawafune <sup>4</sup>, Marcelo J. P. Ferreira <sup>4,\*</sup> and Patricia Sartorelli <sup>1,\*</sup>

### Table of contents

| <i>Suppl. Material</i> | <i>Title</i>                                                          | <i>Page</i> |
|------------------------|-----------------------------------------------------------------------|-------------|
| Suppl. I               | Phylogenetic tree for <i>Diaporthe</i> sp.                            | 1           |
| Suppl. II              | Molecular Networking                                                  | 2           |
| Suppl. III             | Cytochalasan derivative annotations                                   | 3           |
| Suppl. IV              | Molecular family of cytochalasan.                                     | 4           |
| Suppl. V               | Octaketide derivatives annotations from <i>C. arborea</i> endophytes. | 5           |
| Suppl. VI              | Molecular family of dothiorelone.                                     | 6           |
| Suppl. VII             | Molecular family of cytosporone.                                      | 7           |
| Suppl. VIII            | Other compounds annotations.                                          | 8           |
| Suppl. IX              | GNPS Data Analysis Guide.                                             | 9           |

**Suppl. SI:** Phylogenetic tree generated by the analysis of maximum parsimony and bayesian sequences of the ITS region of the rDNA of Diaporthaceae species with the se-lected strains (highlighted in gold). Support values are maximum parsimony and bayes-ian analysis, respectively. To the left of the name of each species is the access code to Gen-bank.

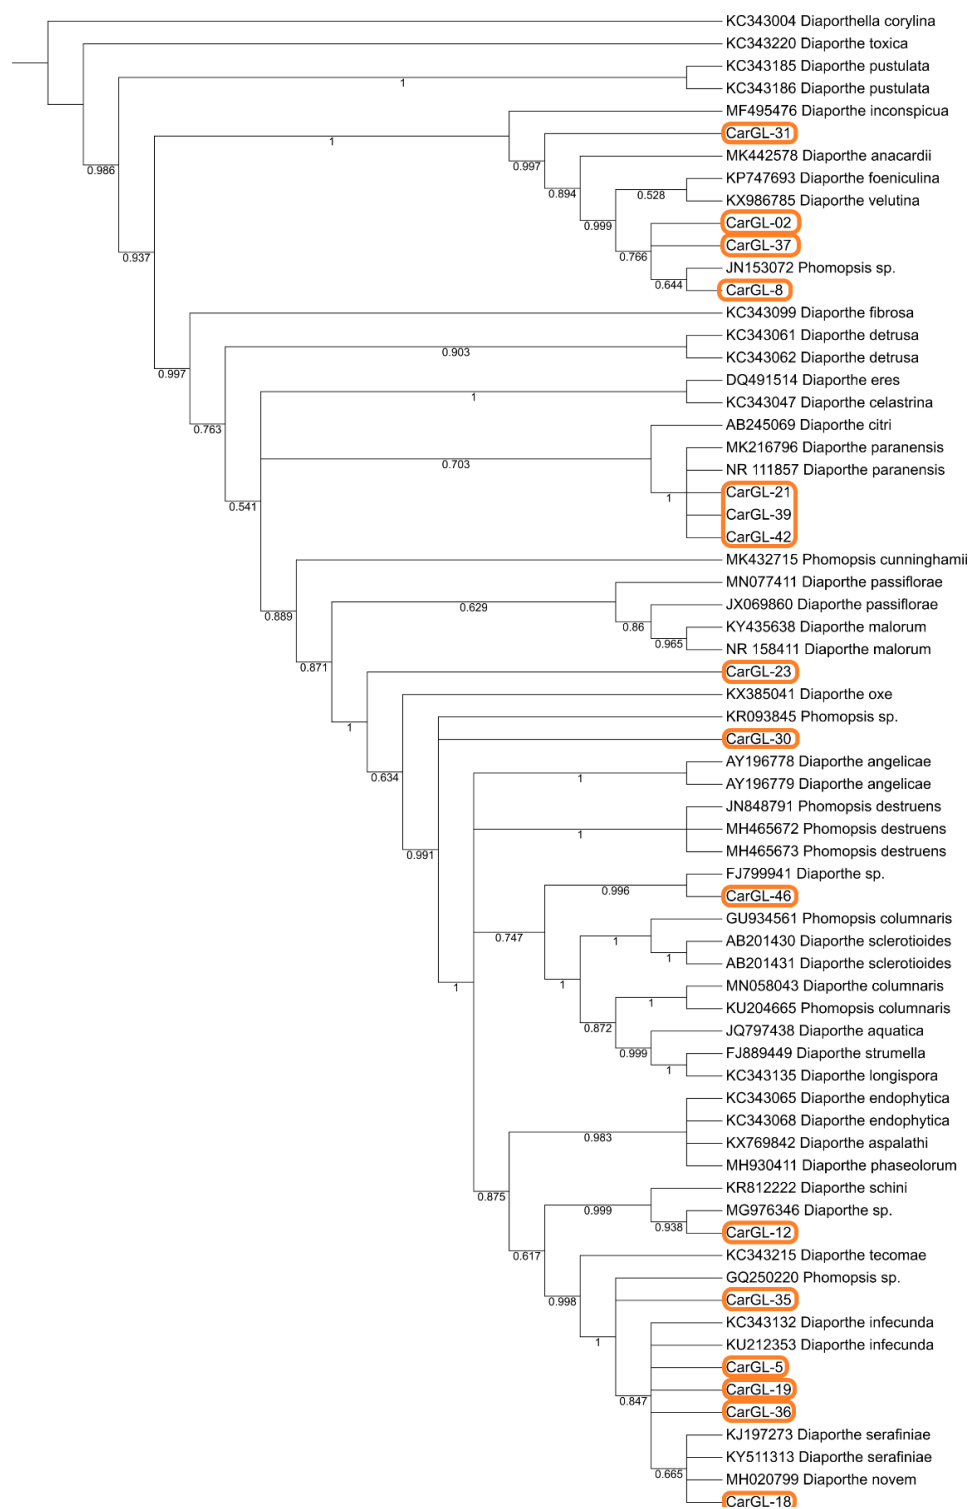

**Suppl. SII:** Metabolome of endophytes organized in molecular networking format based on extracts from the endophytic fungi incubation in R and PDB. The metabolic clas-ses are emphasized bellow the respective molecular family in the left, as the unknown metabolites cluster spectra are represented in the right. Colors represents groups G1 to G4 as follows: *Phomopsis* sp. CarGL23 (G1 pink), *Colletotrichum* sp. (G2 blue), *Diaporthe* spp. (G3 green) and *Diaporthe paranensis* (G4 orange). Spectra detected in medium culture and blank were removed from MN.

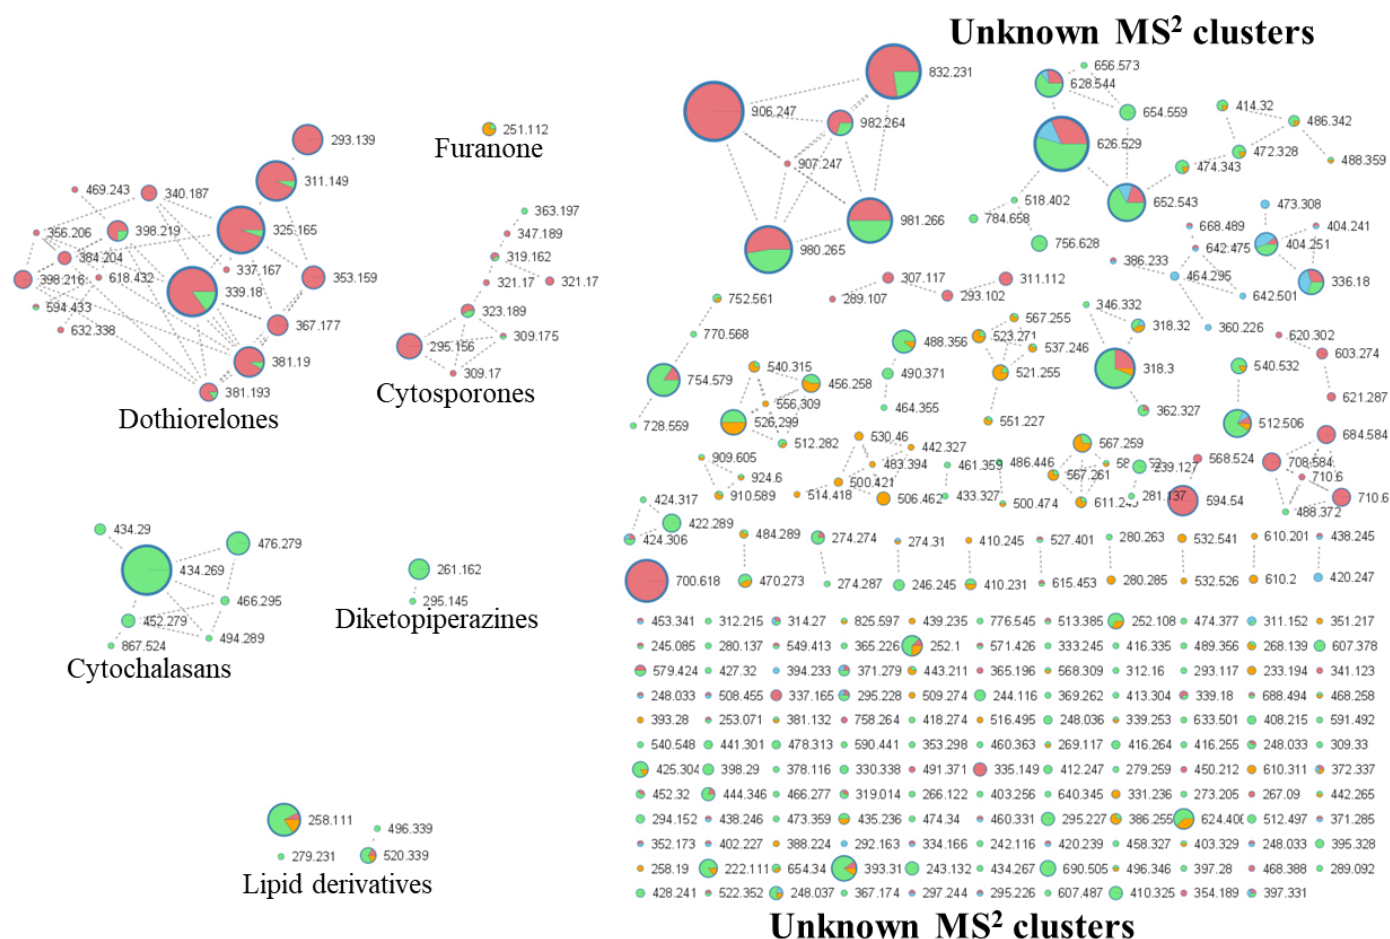

**Suppl. SIII: Cytochalasan derivatives annotations from *C. arborea* endophytes.**

| Cluster Index | Strain | Name                                            | QTof                    | ESI-(+) |
|---------------|--------|-------------------------------------------------|-------------------------|---------|
| 1115          | 2R, 8R | Cytochalasin J (Cyt-J)                          | 434, 416, 398, 251, 120 | 452.279 |
| 1116          | 37R    |                                                 | 434, 416, 398, 251, 120 | 452.305 |
| 1187          | 2R, 8R | 18-Methoxy Cytochalasin J (Cyt-J <sub>1</sub> ) | 434, 416, 398, 251, 120 | 466.295 |
| 1224          | 37R    | 18-Deoxy Cytochalasin H                         | 416, 398, 251, 120      | 476.279 |
| 1227          |        | (18-Deoxy Cyt-H)                                | 416, 398, 269, 242, 120 | 476.298 |
| 1281          | 8R     | Cytochalasin H (Cyt-H)                          | 476, 434, 416, 398, 392 | 494.289 |
| 2114          | 2R, 8R | 2 x 433 [2M+H] <sup>+</sup>                     | 434, 416, 398           | 867.524 |

**Suppl. SIV: Molecular family of cytochalasan.**

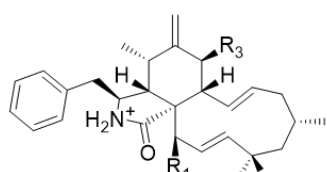

Cyt-J (R<sub>1</sub> = OH, R<sub>2</sub> = OH, R<sub>3</sub> = OH) *m/z* 452.280  
 Cyt-J<sub>1</sub> (R<sub>1</sub> = OMe, R<sub>2</sub> = OH, R<sub>3</sub> = OH) *m/z* 466.296  
 18-Deoxy Cyt-H<sub>1</sub> (R<sub>1</sub> = OAc, R<sub>2</sub> = H, R<sub>3</sub> = O) *m/z* 476.280  
 Cyt-H (R<sub>1</sub> = OAc, R<sub>2</sub> = OH, R<sub>3</sub> = OH) *m/z* 494.291

**Cyt-J:** *Diaporthe* 2R, 8R, 37R  
**Cyt-J<sub>1</sub>:** *Diaporthe* 2R, 8R  
**18-Deoxy Cyt-H:** *Diaporthe* 2R, 8R, 37R  
**Cyt-H:** *Diaporthe* 8R

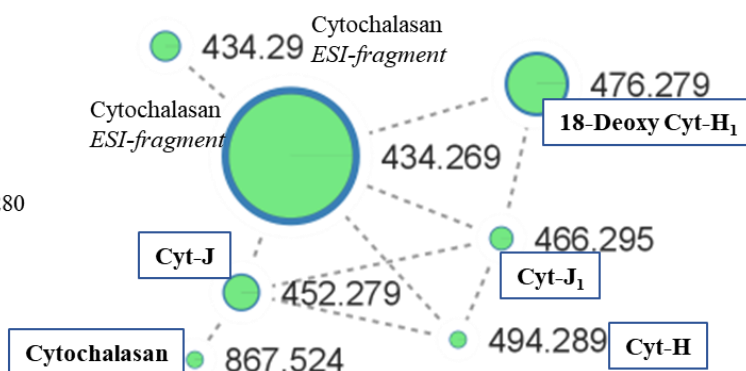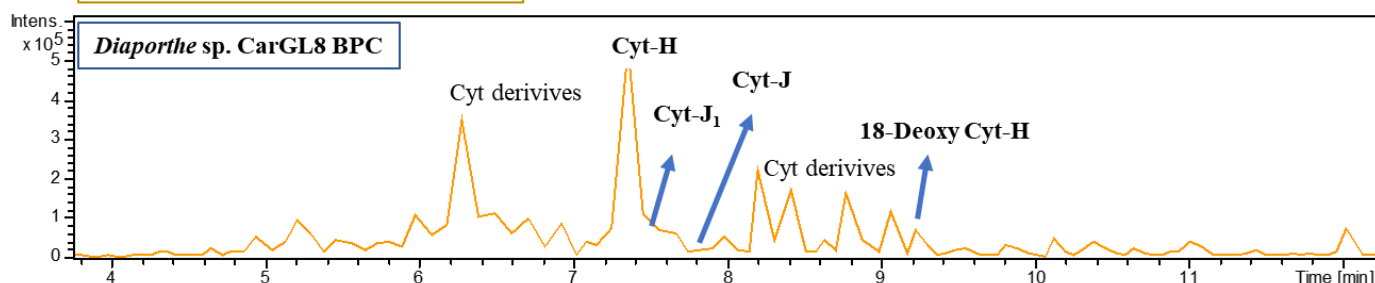

**Suppl SV: Octaketide derivatives annotations from *C. arborea* endophytes.**

| Cluster Index                                      | Strain      | Name                                     | Cosine threshold           | <i>m/z</i> error (ppm) | [M+H] <sup>+</sup> |
|----------------------------------------------------|-------------|------------------------------------------|----------------------------|------------------------|--------------------|
| 295                                                | 23R         | Curvularin (Dot ESI fragment)            | 0.80                       | 3                      | 293.139            |
| <i>Dothiorelone derivatives manual annotations</i> |             |                                          |                            |                        |                    |
| Cluster Index                                      | Strain      | Name                                     | QTof                       | ESI-(+)                |                    |
| 428                                                | 23R, 8R     | Dothiorelone P or Q (Dot-P/Q)            | 275, 125, 97               | 311.149                |                    |
| 514                                                | 23R, 8R     | Cytosporone M (Csn-M)                    | 275, 125, 97               | 325.165                |                    |
| 580                                                | 23R         | <b>Dothiorelone derivative</b>           | 275, 257, 125(123), 95(97) | 337.167                |                    |
| 601                                                | 2R, 8R, 23R | Dothiorelone A or B (Dot-A/B)            | 275, 125, 97               | 339.180                |                    |
| 603                                                | 30R, 37R    |                                          | 293, 257, 249, 125, 97     | 339.201                |                    |
| 652                                                | 23R         | <b>Dothiorelone derivative</b>           | 293, 275, 257, 125, 97     | 353.159                |                    |
| 723                                                | 23R         | 15-Acetoxy Cytosporone N (15-OAc Csn-N)* | 307, 275, 125, 97          | 367.177                |                    |

|                                                   |          |                                             |                                 |         |
|---------------------------------------------------|----------|---------------------------------------------|---------------------------------|---------|
| 780, 781                                          | 23R, 30R | 15-Acetoxy Dothiorelone A<br>(15-OAc Dot-A) | 275, 125, 97                    | 381.193 |
| <i>Cytosporone derivatives manual annotations</i> |          |                                             |                                 |         |
| 321                                               | 23R      | Cytosporone A (Csn-A)                       | 277, 249, 181,<br>127, 123, 109 | 295.156 |
| 396                                               | 23R      | Cytosporone N (Csn-N)                       | 277, 249, 127, 109              | 309.170 |
| 501                                               | 23R      | OAc-Dot A/B<br>ESI fragment                 | 275, 247, 125                   | 321.170 |
| 492                                               | 23R, 30R | Cytosporone F<br>(Csn-F)                    | 273, 245, 123, 107              | 319.162 |
| 508                                               | 23R, 30R | Cytosporone B<br>(Csn-B)                    | 277, 249, 127, 109              | 323.189 |

\*Reference: Beekman, A.M. and Barrow, R.A. (2015) Syntheses of cytosporones A, C, J, K, and N, metabolites from medicinal fungi. *Australian Journal of Chemistry* **68**, 1583-1592.

### Suppl SVI: Molecular family of dothiorelone.

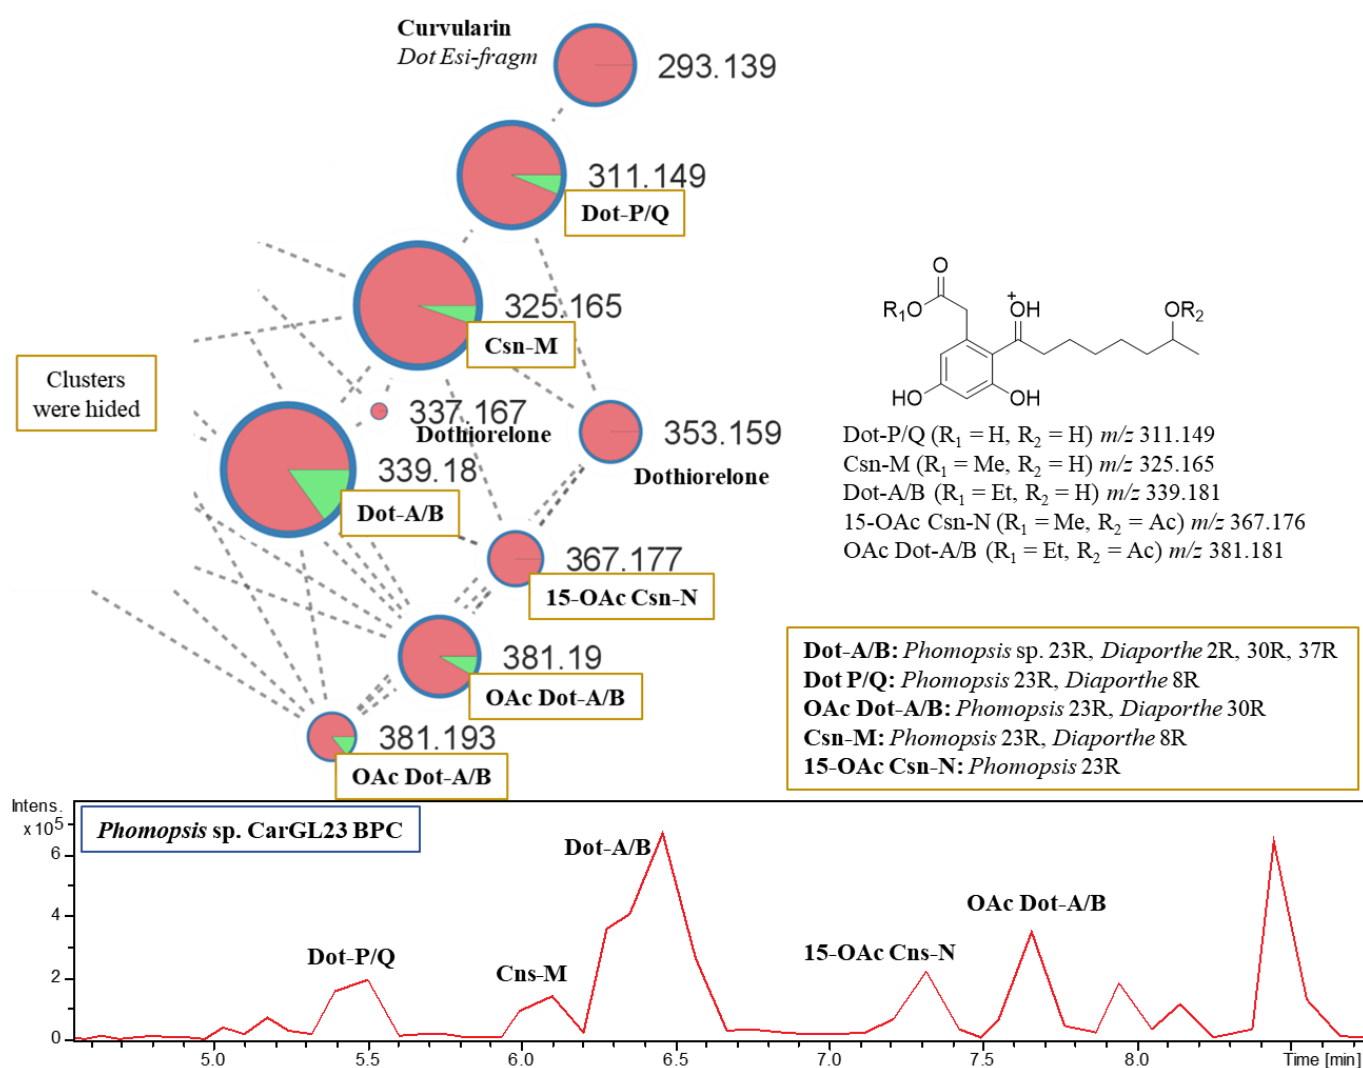

## Suppl. SVII: Molecular family of cytosporone.

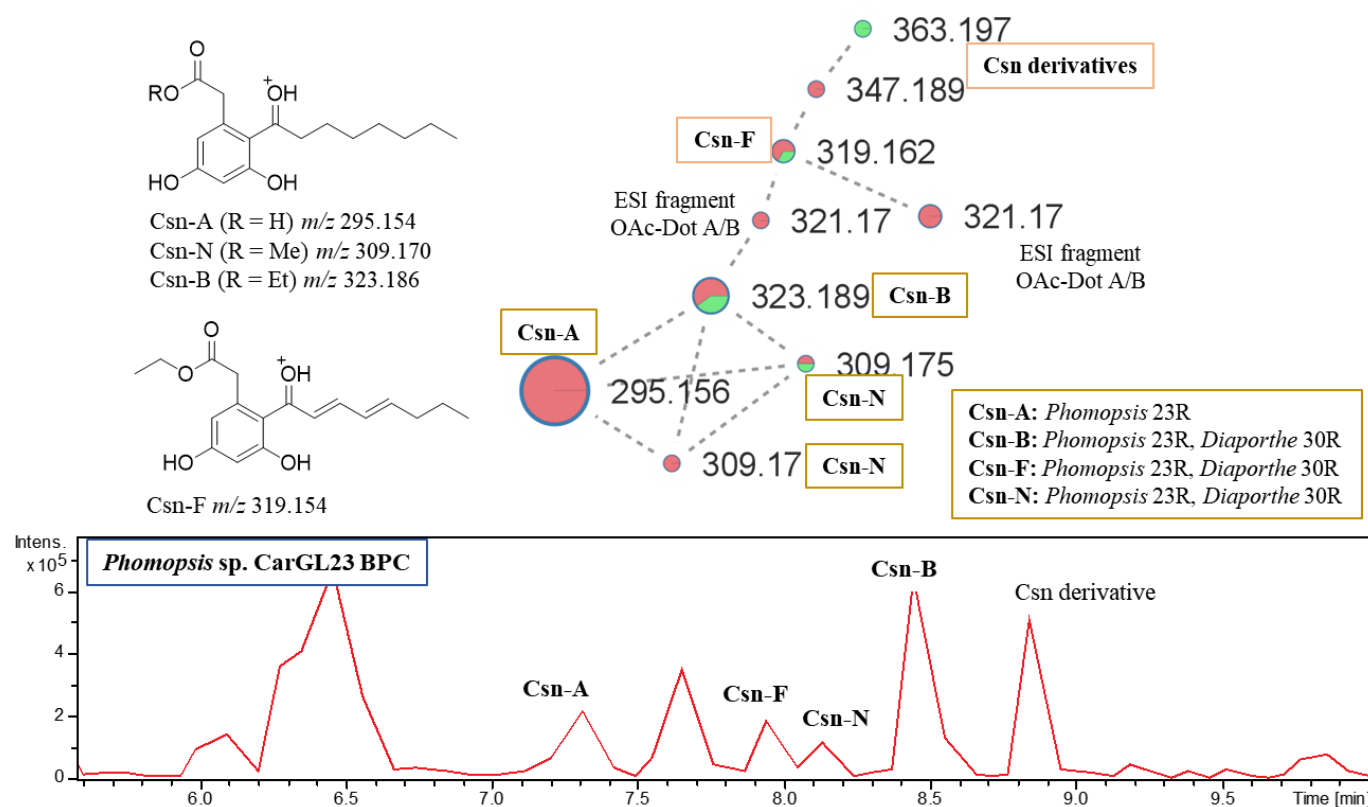

## Suppl. SVIII: Other compounds annotations from *C. arborea* endophytes.

| Cluster Index | Strain                                                            | Name                     | Cosine threshold | $m/z$ error (ppm) | [M+H] <sup>+</sup> |
|---------------|-------------------------------------------------------------------|--------------------------|------------------|-------------------|--------------------|
| 111           | 21R<br>2PD, 21PD, 39PD, 42PD                                      | Ralfuranone L            | 0.78             | 19                | 251.112            |
| 153           | 2R, 5R, 18R, 19R, 35R, 36R, 37R, 46R                              | cyclo(Phe-Leu)           | 0.72             | 11                | 261.162            |
| 137           | 2R, 5R, 19R, 21R, 23R, 30R, 35R, 36R, 39R, 46R<br>5PD, 18PD, 36PD | Choline glycerophosphate | 0.91             | 3                 | 258.111            |
| 1289          | 2R, 46R                                                           | LysoPC(16:0)             | 0.90             | 0                 | 496.339            |
| 1378          | 2R, 21R, 23R, 46R<br>18PD, 19PD                                   | LysoPC(18:2/0:0)         | 0.86             | 3                 | 520.339            |
| 229           | 19R, 35R                                                          | Pinolenic acid           | 0.69             | 3                 | 279.231            |

## Suppl. SIX: GNPS Data Analysis Guide

“A” files: rice incubation; “B” or “BD”: potato dextrose broth incubation.

**MassIVE Dataset:** MSV000086335.

*Casearia arborea*'s endophytic fungi active extracts [doi:10.25345/C5CJ5B].

## Data Analysis

### Basic options

- Mass tolerance for parent ions and fragment ions: 0.02

- G1: *Phomopsis* sp. CarGL23
- G2: *Colletotrichum* sp. CarGL22
- G3: *Diaporthe* spp.
- G4: *Diaporthe paranensis*
- G5: Rice, PD broth
- G6: blank (concentrated solvents from chromatographic procedures, diluted in methanol:acetonitrile 1:1)

#### *Advanced Molecular Networking options*

- Cosine: 0.7
- Minimum matched peaks: 3
- Cluster size: at least 2 spectra
- Network TopK: 10
- Max. connected component size: 100
- Google Sheets Metadata URL:

#### *Advanced Library Search options*

- Score threshold: 0.65
- Matched peaks: 4
- Search analogs: Don't search
- Max. analog search mass diff: 100.0

#### *Advanced Filter options*

- Filter below Std Dev: 0
- Min. peak intensity: 0
- Filter precursor window: Filter
- Filter library: filter library
- Filter peaks in a 50 Da window: Filter
- Filter spectra from G6 as blank to remove them from networking: Filter
